# Supplementary material for: Epidemiology and Trends over Time of Foreign Body Injuries in the Pediatric Emergency Department
Source: MDPI journal article supplement (doi:10.3390/children8100938), 2021-10-19
Supplement: s1 [file s1]

## Supplementary Material

**Table S1.** Descriptive characteristics of children with FB presentations to the pediatric emergency department of Padova. Continuous data are reported as median (I, III quartiles), categorical data are re-reported as absolute numbers (percentages). The chi square test or Fisher exact test, whatever appropriate, has been performed.

|                              |                    |          | Infant toddler (< 2<br>y) | Pre-schooler (< 6<br>y) | Schooler (> 6<br>y) | Overall       | P-<br>Value |
|------------------------------|--------------------|----------|---------------------------|-------------------------|---------------------|---------------|-------------|
|                              |                    |          | (N=1112)                  | (N=980)                 | (N=992)             | (N=3084)      | Statistic   |
| <b>Gender</b>                | Female             | 308<br>4 | 50% (555)                 | 43% (422)               | 40% (398)           | 45%<br>(1375) | <0.001      |
|                              | Male               | -        | 50% (557)                 | 57% (558)               | 60% (594)           | 55%<br>(1709) |             |
| <b>Foreign Body<br/>type</b> | No-food            | 591      | 70% (172)                 | 73% (137)               | 54% (85)            | 67% (394)     | <0.001      |
|                              | Food               | -        | 30% (75)                  | 27% (51)                | 46% (71)            | 33% (197)     |             |
| <b>Foreign Body site</b>     | Ears, nose throat  | 256<br>6 | 46% (427)                 | 53% (444)               | 37% (298)           | 46%<br>(1169) | <0.001      |
|                              | Gastrointestinal   | -        | 50% (468)                 | 39% (328)               | 30% (238)           | 40%<br>(1034) |             |
| <b>Outcome</b>               | Eyes               | -        | 4% (33)                   | 8% (71)                 | 33% (259)           | 14% (363)     | <0.001      |
|                              | Death              | 308<br>4 | 0% (0)                    | 0% (0)                  | 0% (0)              | 0% (0)        |             |
|                              | Discharged<br>home | -        | 91% (1007)                | 95% (927)               | 95% (943)           | 93%<br>(2877) |             |
|                              | Admitted           | -        | 8% (94)                   | 4% (38)                 | 4% (38)             | 6% (170)      |             |
|                              | Other              | -        | 1% (11)                   | 2% (15)                 | 1% (11)             | 1% (37)       |             |

**Table S2**

Incidence Rate (IR) table according to the year and clinical characteristics (sex, nationality, foreign body type, triage color and FB location).

The absolute number of FB injuries events have been reported with 95% Poisson Confidence interval for IR over 1000 resident population. Percentages (%) of FB injury events over PED presentations have also been reported with a 95% confidence interval. Univariate GLM Poisson P-values for the relation between time and FB incidence had been indicated.

| Year          | 2007                  | 2008                 | 2009                  | 2010                   | 2011                   | 2012                   | 2013                 | 2014                  | 2015                 | 2016                  | 2017                  | 2018                  | P-value |
|---------------|-----------------------|----------------------|-----------------------|------------------------|------------------------|------------------------|----------------------|-----------------------|----------------------|-----------------------|-----------------------|-----------------------|---------|
| <b>Female</b> |                       |                      |                       |                        |                        |                        |                      |                       |                      |                       |                       |                       |         |
| FB Events     | 106                   | 99                   | 131                   | 114                    | 121                    | 108                    | 105                  | 108                   | 111                  | 96                    | 135                   | 141                   |         |
| IR            | 9<br>(7.44,10.79)     | 8.36<br>(6.87,10.08) | 10.83<br>(9.13,12.76) | 9.32<br>(7.76,11.11)   | 9.81<br>(8.22,11.64)   | 8.77<br>(7.27,10.5)    | 8.45<br>(6.99,10.15) | 8.63<br>(7.15,10.33)  | 8.8<br>(7.31,10.51)  | 7.68<br>(6.29,9.28)   | 10.99<br>(9.29,12.92) | 11.53<br>(9.78,13.5)  | 0.283   |
| % ED Accesses | 1.4<br>(1.17,1.7)     | 1.3<br>(1.05,1.56)   | 1.7<br>(1.44,2.01)    | 1.5<br>(1.22,1.75)     | 1.6<br>(1.31,1.87)     | 1.4<br>(1.2,1.74)      | 1.5<br>(1.2,1.76)    | 1.4<br>(1.2,1.75)     | 1.6<br>(1.31,1.9)    | 1.3<br>(1.08,1.6)     | 1.6<br>(1.34,1.87)    | 1.6<br>(1.37,1.89)    | 0.422   |
| <b>Male</b>   |                       |                      |                       |                        |                        |                        |                      |                       |                      |                       |                       |                       |         |
| FB Events     | 148                   | 111                  | 119                   | 164                    | 162                    | 152                    | 122                  | 140                   | 127                  | 143                   | 141                   | 180                   |         |
| IR            | 11.82<br>(10.07,13.8) | 8.81<br>(7.32,10.53) | 9.29<br>(7.77,11.03)  | 12.66<br>(10.87,14.67) | 12.52<br>(10.73,14.51) | 11.73<br>(10.01,13.67) | 9.31<br>(7.8,11.03)  | 10.36<br>(8.79,12.15) | 9.38<br>(7.89,11.08) | 10.66<br>(9.06,12.48) | 10.6<br>(8.99,12.42)  | 13.72<br>(11.86,15.8) | 0.341   |

|                      |                           |                           |                           |                           |                           |                           |                          |                          |                          |                          |                           |                            |           |
|----------------------|---------------------------|---------------------------|---------------------------|---------------------------|---------------------------|---------------------------|--------------------------|--------------------------|--------------------------|--------------------------|---------------------------|----------------------------|-----------|
| % ED<br>Access<br>es | 1.5<br>(1.3,1.79<br>)     | 1.1<br>(0.93,1.3<br>5)    | 1.2<br>(1.01,1.44<br>)    | 1.8<br>(1.47,1.99<br>)    | 1.6<br>(1.41,1.91<br>)    | 1.6<br>(1.39,1.9)         | 1.3<br>(1.11,1.5<br>7)   | 1.4<br>(1.22,1.6<br>9)   | 1.3<br>(1.14,1.6<br>)    | 1.5<br>(1.26,1.75<br>)   | 1.2<br>(1.06,1.47<br>)    | 1.5<br>(1.33,1.78<br>)     | 0.79<br>6 |
| Italian              |                           |                           |                           |                           |                           |                           |                          |                          |                          |                          |                           |                            |           |
| FB<br>Events         | 225                       | 172                       | 215                       | 220                       | 231                       | 206                       | 179                      | 193                      | 183                      | 181                      | 208                       | 254                        |           |
| IR                   | 10.61<br>(9.31,12.<br>04) | 8.17<br>(7.04,9.4<br>3)   | 10.33<br>(9.04,11.7<br>6) | 10.71<br>(9.39,12.1<br>7) | 11.38<br>(10,12.89)       | 10.01<br>(8.74,11.4<br>3) | 8.85<br>(7.64,10.<br>19) | 9.68<br>(8.41,11.<br>09) | 9.26<br>(8.02,10.<br>65) | 9.29<br>(8.03,10.6<br>9) | 10.72<br>(9.36,12.2<br>3) | 13.21<br>(11.69,14.<br>89) | 0.08      |
| % ED<br>Access<br>es | 1.6<br>(1.38,1.7<br>9)    | 1.2<br>(1.03,1.3<br>9)    | 1.6<br>(1.37,1.78<br>)    | 1.6<br>(1.42,1.85<br>)    | 1.7<br>(1.51,1.95<br>)    | 1.6<br>(1.38,1.81<br>)    | 1.4<br>(1.22,1.6<br>4)   | 1.47<br>(1.28,1.6<br>9)  | 1.5<br>(1.28,1.7<br>)    | 1.4<br>(1.21,1.62<br>)   | 1.4<br>(1.18,1.55<br>)    | 1.6<br>(1.42,1.81<br>)     | 0.74<br>7 |
| Not Italian          |                           |                           |                           |                           |                           |                           |                          |                          |                          |                          |                           |                            |           |
| FB<br>Events         | 29                        | 38                        | 35                        | 58                        | 52                        | 54                        | 48                       | 55                       | 55                       | 58                       | 68                        | 67                         |           |
| IR                   | 9.36<br>(6.53,13.<br>06)  | 11.21<br>(8.18,15.<br>05) | 8.53<br>(6.14,11.5<br>7)  | 12.48<br>(9.66,15.8<br>9) | 10.46<br>(7.99,13.4<br>9) | 11.5<br>(8.82,14.7<br>6)  | 9.07<br>(6.85,11.<br>81) | 9.05<br>(6.96,11.<br>59) | 8.6<br>(6.61,11.<br>02)  | 9.03<br>(6.99,11.5<br>)  | 10.98<br>(8.67,13.7<br>4) | 10.93<br>(8.62,13.7<br>)   | 0.8       |
| % ED<br>Access<br>es | 1.0<br>(0.7,1.4)          | 1.2<br>(0.8,1.6)          | 0.9<br>(0.7,1.3)          | 1.5 (1.2,2)               | 1.3 (1,1.6)               | 1.4<br>(1.1,1.9)          | 1.3<br>(1,1.7)           | 1.3<br>(1,1.7)           | 1.4<br>(1,1.8)           | 1.4<br>(1.1,1.9)         | 1.5<br>(1.2,1.9)          | 1.5<br>(1.2,1.9)           | 0.01<br>1 |
| Food                 |                           |                           |                           |                           |                           |                           |                          |                          |                          |                          |                           |                            |           |
| FB<br>Events         | 21                        | 12                        | 17                        | 16                        | 14                        | 17                        | 12                       | 19                       | 21                       | 12                       | 16                        | 20                         |           |

|                     |                     |                     |                     |                     |                     |                     |                     |                     |                     |                     |                     |                     |       |
|---------------------|---------------------|---------------------|---------------------|---------------------|---------------------|---------------------|---------------------|---------------------|---------------------|---------------------|---------------------|---------------------|-------|
| IR                  | 0.86<br>(0.57,1.27) | 0.49<br>(0.28,0.81) | 0.68<br>(0.43,1.04) | 0.64<br>(0.39,0.98) | 0.55<br>(0.33,0.88) | 0.67<br>(0.42,1.03) | 0.47<br>(0.27,0.77) | 0.73<br>(0.47,1.09) | 0.8<br>(0.53,1.18)  | 0.46<br>(0.27,0.76) | 0.63<br>(0.39,0.97) | 0.79<br>(0.51,1.17) | 0.987 |
| % ED Accesses       | 8.3<br>(5.47,12.31) | 5.7<br>(3.3,9.72)   | 6.8<br>(4.29,10.62) | 5.8<br>(3.57,9.14)  | 4.9<br>(2.97,8.13)  | 6.5<br>(4.12,10.22) | 5.3<br>(3.05,9.01)  | 7.7<br>(4.96,11.65) | 8.8<br>(5.84,13.11) | 5.0<br>(2.9,8.57)   | 5.8<br>(3.6,9.21)   | 6.2<br>(4.07,9.43)  | 0.733 |
| No food             |                     |                     |                     |                     |                     |                     |                     |                     |                     |                     |                     |                     |       |
| FB Events           | 25                  | 27                  | 36                  | 43                  | 35                  | 34                  | 30                  | 37                  | 34                  | 34                  | 25                  | 34                  |       |
| IR                  | 1.03<br>(0.7,1.47)  | 1.1<br>(0.76,1.56)  | 1.45<br>(1.05,1.95) | 1.71<br>(1.27,2.25) | 1.38<br>(1,1.88)    | 1.35<br>(0.96,1.83) | 1.18<br>(0.83,1.63) | 1.42<br>(1.03,1.92) | 1.3<br>(0.93,1.77)  | 1.31<br>(0.94,1.79) | 0.98<br>(0.66,1.4)  | 1.34<br>(0.96,1.83) | 0.866 |
| % ED Accesses       | 9.8<br>(6.8,14.1)   | 12.9<br>(9,18.1)    | 14.4<br>(10.6,19.3) | 15.5<br>(11.7,20.2) | 12.4<br>(9,16.7)    | 13.1<br>(9.5,17.7)  | 13.2<br>(9.4,18.2)  | 14.9<br>(11,19.9)   | 14.3<br>(10.4,19.3) | 14.2<br>(10.4,19.2) | 9.1<br>(6.2,13)     | 10.6<br>(7.7,14.4)  | 0.503 |
| Colour code: Yellow |                     |                     |                     |                     |                     |                     |                     |                     |                     |                     |                     |                     |       |
| FB Events           | 64                  | 46                  | 58                  | 66                  | 43                  | 39                  | 47                  | 55                  | 42                  | 53                  | 42                  | 58                  |       |
| IR                  | 2.63<br>(2.06,3.32) | 1.88<br>(1.41,2.46) | 2.33<br>(1.8,2.96)  | 2.62<br>(2.06,3.29) | 1.7<br>(1.27,2.25)  | 1.54<br>(1.13,2.06) | 1.84<br>(1.39,2.4)  | 2.11<br>(1.63,2.71) | 1.61<br>(1.19,2.13) | 2.04<br>(1.57,2.63) | 1.64<br>(1.22,2.17) | 2.29<br>(1.77,2.91) | 0.093 |
| % ED Accesses       | 2.4<br>(1.9,3.07)   | 1.5<br>(1.12,1.98)  | 1.8<br>(1.4,2.33)   | 2.2<br>(1.75,2.81)  | 1.6<br>(1.22,2.2)   | 1.5<br>(1.1,2.05)   | 1.6<br>(1.2,2.11)   | 1.7<br>(1.34,2.26)  | 1.5<br>(1.11,2.02)  | 1.6<br>(1.25,2.13)  | 1.9<br>(0.95,1.73)  | 1.7<br>(1.31,2.17)  | 0.017 |

| Colour code: Red   |                     |                    |                     |                     |                     |                     |                     |                     |                     |                     |                     |                     |           |
|--------------------|---------------------|--------------------|---------------------|---------------------|---------------------|---------------------|---------------------|---------------------|---------------------|---------------------|---------------------|---------------------|-----------|
| FB Events          | 4                   | 0                  | 0                   | 3                   | 2                   | 8                   | 2                   | 1                   | 3                   | 0                   | 1                   | 3                   |           |
| IR                 | 0.16<br>(0.07,0.36) | 0.0 (0.0, 0.0)     | 0.0 (0.0, 0.0)      | 0.12<br>(0.04,0.29) | 0.08<br>(0.02,0.22) | 0.32<br>(0.16,0.57) | 0.08<br>(0.02,0.22) | 0.04<br>(0.01,0.14) | 0.11<br>(0.04,0.28) | 0.0 (0.0, 0.0)      | 0.04<br>(0.01,0.14) | 0.12<br>(0.04,0.28) | 0.69<br>1 |
| % ED Accesses      | 2.3<br>(0.9,5.8)    | 0.0<br>(0.0,2.3)   | 0.0<br>(0.0,3.3)    | 2.3<br>(0.8,6.7)    | 1.5<br>(0.4,5.4)    | 5 (2.6,9.6)         | 1.8<br>(0.5,6.2)    | 0.8<br>(0.1,4.3)    | 2.2<br>(0.8,6.4)    | 0.0 (0,2.4)         | 0.6<br>(0.1,3.5)    | 1.8<br>(0.6,5.1)    | 0.70<br>3 |
| Colour code: Green |                     |                    |                     |                     |                     |                     |                     |                     |                     |                     |                     |                     |           |
| FB Events          | 162                 | 133                | 166                 | 176                 | 198                 | 190                 | 152                 | 168                 | 155                 | 148                 | 181                 | 217                 |           |
| IR                 | 6.67<br>(5.72,7.73) | 5.44<br>(4.59,6.4) | 6.66<br>(5.73,7.71) | 6.99<br>(6.03,8.06) | 7.83<br>(6.82,8.96) | 7.52<br>(6.52,8.62) | 5.95<br>(5.08,6.94) | 6.46<br>(5.55,7.47) | 5.93<br>(5.07,6.9)  | 5.71<br>(4.86,6.67) | 7.07<br>(6.12,8.14) | 8.56<br>(7.5,9.74)  | 0.16<br>2 |
| % ED Accesses      | 1.4<br>(1.2,1.7)    | 1.2<br>(1,1.4)     | 1.4<br>(1.2,1.7)    | 1.5<br>(1.3,1.8)    | 1.7 (1.5,2)         | 1.8 (1.5,2)         | 1.4<br>(1.2,1.6)    | 1.4<br>(1.2,1.6)    | 1.3<br>(1.1,1.6)    | 1.3<br>(1.1,1.5)    | 1.3<br>(1.2,1.5)    | 1.5<br>(1.3,1.7)    | 0.80<br>9 |
| Colour code: White |                     |                    |                     |                     |                     |                     |                     |                     |                     |                     |                     |                     |           |
| FB Events          | 24                  | 31                 | 26                  | 33                  | 40                  | 23                  | 26                  | 24                  | 38                  | 38                  | 52                  | 43                  |           |
| IR                 | 0.99<br>(0.67,1.42) | 1.27<br>(0.9,1.75) | 1.04<br>(0.71,1.48) | 1.31<br>(0.93,1.79) | 1.58<br>(1.16,2.11) | 0.91<br>(0.61,1.32) | 1.02<br>(0.7,1.45)  | 0.92<br>(0.62,1.33) | 1.45<br>(1.06,1.95) | 1.47<br>(1.07,1.97) | 2.03<br>(1.55,2.62) | 1.7<br>(1.26,2.24)  | 0.00<br>3 |

|                                          |                      |                      |                       |                       |                       |                       |                      |                      |                      |                       |                       |                       |       |
|------------------------------------------|----------------------|----------------------|-----------------------|-----------------------|-----------------------|-----------------------|----------------------|----------------------|----------------------|-----------------------|-----------------------|-----------------------|-------|
| % ED<br>Access<br>es                     | 0.8<br>(0.5,1.1)     | 1.1<br>(0.7,1.5)     | 1 (0.7,1.5)           | 1.2<br>(0.9,1.7)      | 1.2<br>(0.9,1.6)      | 0.7<br>(0.5,1.1)      | 1.2<br>(0.8,1.7)     | 1.3<br>(0.9,1.9)     | 2.0<br>(1.4,2.7)     | 1.8<br>(1.3,2.4)      | 1.9<br>(1.4,2.4)      | 1.7<br>(1.3,2.3)      |       |
| Foreign body location: Ear, nose, throat |                      |                      |                       |                       |                       |                       |                      |                      |                      |                       |                       |                       |       |
| FB<br>Events                             | 83                   | 72                   | 80                    | 87                    | 113                   | 94                    | 85                   | 96                   | 92                   | 96                    | 127                   | 144                   |       |
| IR                                       | 3.41<br>(2.76,4.19)  | 2.95<br>(2.34,3.66)  | 3.21<br>(2.58,3.95)   | 3.45<br>(2.8,4.22)    | 4.47<br>(3.72,5.33)   | 3.72<br>(3.04,4.51)   | 3.33<br>(2.69,4.07)  | 3.69<br>(3.02,4.46)  | 3.52<br>(2.87,4.27)  | 3.7<br>(3.04,4.48)    | 4.96<br>(4.17,5.86)   | 5.68<br>(4.83,6.64)   |       |
| % ED<br>Access<br>es                     | 32.7<br>(27.2,38.67) | 34.3<br>(28.2,40.94) | 32.0<br>(26.53,38.02) | 31.3<br>(26.13,36.97) | 39.4<br>(34.39,45.73) | 36.2<br>(30.55,42.16) | 37.4<br>(31.41,43.9) | 38.7<br>(32.86,44.9) | 38.7<br>(32.7,44.98) | 40.2<br>(34.16,46.49) | 46.0<br>(40.23,51.91) | 44.8<br>(39.51,50.33) |       |
| Foreign body location: Gastrointestinal  |                      |                      |                       |                       |                       |                       |                      |                      |                      |                       |                       |                       |       |
| FB<br>Events                             | 83                   | 65                   | 87                    | 104                   | 88                    | 90                    | 80                   | 88                   | 84                   | 75                    | 79                    | 111                   |       |
| IR                                       | 3.41<br>(2.76,4.19)  | 2.66<br>(2.09,3.34)  | 3.49<br>(2.83,4.26)   | 4.13<br>(3.41,4.96)   | 3.48<br>(2.83,4.25)   | 3.56<br>(2.9,4.33)    | 3.13<br>(2.52,3.86)  | 3.38<br>(2.75,4.12)  | 3.21<br>(2.6,3.93)   | 2.89<br>(2.31,3.58)   | 3.09<br>(2.48,3.8)    | 4.38<br>(3.64,5.23)   | 0.597 |
| % ED<br>Access<br>es                     | 32.7<br>(27.2,38.7)  | 31.0<br>(25.1,37.5)  | 34.8<br>(29.2,40.9)   | 37.4<br>(31.9,43.2)   | 31.1<br>(26,36.7)     | 34.6<br>(29.1,40.6)   | 35.2<br>(29.3,41.7)  | 35.5<br>(29.8,41.6)  | 35.3<br>(29.5,41.6)  | 31.4<br>(25.8,37.5)   | 28.6<br>(23.6,34.2)   | 34.6<br>(29.6,39.9)   | 0.765 |
| Foreign body location: Eyes              |                      |                      |                       |                       |                       |                       |                      |                      |                      |                       |                       |                       |       |
| FB<br>Events                             | 41                   | 40                   | 43                    | 37                    | 27                    | 31                    | 24                   | 25                   | 21                   | 23                    | 28                    | 23                    |       |

|               |                     |                     |                     |                     |                     |                     |                     |                     |                    |                     |                     |                     |
|---------------|---------------------|---------------------|---------------------|---------------------|---------------------|---------------------|---------------------|---------------------|--------------------|---------------------|---------------------|---------------------|
| IR            | 1.69<br>(1.25,2.24) | 1.64<br>(1.2,2.18)  | 1.73<br>(1.28,2.28) | 1.47<br>(1.07,1.98) | 1.07<br>(0.74,1.51) | 1.23<br>(0.87,1.69) | 0.94<br>(0.63,1.35) | 0.96<br>(0.65,1.37) | 0.8<br>(0.53,1.18) | 0.89<br>(0.59,1.29) | 1.09<br>(0.76,1.54) | 0.91<br>(0.61,1.31) |
| % ED Accesses | 16.1<br>(12.1,21.2) | 19.0<br>(14.3,24.9) | 17.2<br>(13,22.4)   | 13.3<br>(9.8,17.8)  | 9.5<br>(6.6,13.5)   | 11.9<br>(8.5,16.4)  | 10.6<br>(7.2,15.2)  | 10.1<br>(6.9,14.5)  | 8.8<br>(5.8,13.1)  | 9.6<br>(6.5,14)     | 10.1<br>(7.1,14.3)  | 7.2<br>(4.8,10.5)   |

Abbreviations: ED, emergency department, FB, foreign body, IR, incidence rate
